# Supplementary material
Source: publisher site journal article supplement (https://www.dovepress.com/article/458030)
Supplement: Supplementary file 1 [file get_supplementary_file.php]

**Supplemental material**

| **Table S1. qPCR primer sequences** | |
| --- | --- |
| **Primer** | **sequence** |
| CD44-F1 | 5’-TCGATTTGAATGTAACCTGCCG-3’ |
| CD44-R1 | 5’-CAGTCCGGGAGATACTGTAGC-3’ |
| CD47-F1 | 5’-TGGTGGGAAACTACACTTGCG-3’ |
| CD47-R1 | 5’-CGTGCGGTTTTTCAGCTCTAT-3’ |
| HAVCR2-F1 | 5’-TCAGGTCTTACCCTCAACTGTG-3’ |
| HAVCR2-R1 | 5’-GGCATTCTTACCAACCTCAAACA-3’ |
| SIRPA-F1 | 5’-CCACGGGGAAGGAACTGAAG-3’ |
| SIRPA-R1 | 5’-ACGTATTCTCCTGCGAAACTGTA-3’ |
| TNFSF9-F1 | 5’-CGGCGCTCCTCAGAGATAC-3’ |
| TNFSF9-R1 | 5’-ATCCCGAACATTAACCGCAGG-3’ |
| VTCN1-F1 | 5’-GGCCTGGGCATCTCAAGTC-3’ |
| VTCN1-R1 | 5’-TTGTAGAGCACAGATACGACCT-3’ |

**Table S2. GO terms enrichment analysis**

| ONTOLOGY | ID | Description | p.adjust |
| --- | --- | --- | --- |
| CC | GO:0098793 | presynapse | 5.87E-15 |
| BP | GO:0023061 | signal release | 7.88E-15 |
| BP | GO:0010817 | regulation of hormone levels | 6.27E-11 |
| CC | GO:0030133 | transport vesicle | 8.77E-13 |
| BP | GO:0050804 | modulation of chemical synaptic transmission | 7.17E-11 |
| BP | GO:0099177 | regulation of trans-synaptic signaling | 7.26E-11 |
| BP | GO:0009306 | protein secretion | 2.22E-12 |
| BP | GO:0035592 | establishment of protein localization to extracellular region | 2.22E-12 |
| BP | GO:0071692 | protein localization to extracellular region | 3.85E-12 |
| CC | GO:0043025 | neuronal cell body | 4.00E-08 |
| BP | GO:0015833 | peptide transport | 3.27E-13 |
| BP | GO:0046879 | hormone secretion | 4.38E-12 |
| BP | GO:0042886 | amide transport | 7.07E-12 |
| BP | GO:0009914 | hormone transport | 8.56E-12 |
| BP | GO:0030072 | peptide hormone secretion | 1.58E-13 |
| BP | GO:0002790 | peptide secretion | 1.98E-13 |
| BP | GO:0072503 | cellular divalent inorganic cation homeostasis | 6.34E-05 |
| BP | GO:0051223 | regulation of protein transport | 6.46E-05 |
| CC | GO:0070382 | exocytic vesicle | 4.52E-13 |
| BP | GO:0006887 | exocytosis | 4.00E-07 |
| BP | GO:0050808 | synapse organization | 1.02E-05 |
| BP | GO:0055074 | calcium ion homeostasis | 6.87E-05 |
| CC | GO:0008021 | synaptic vesicle | 4.52E-13 |
| CC | GO:0030658 | transport vesicle membrane | 8.77E-13 |
| MF | GO:0046873 | metal ion transmembrane transporter activity | 0.000123 |
| BP | GO:0030073 | insulin secretion | 1.64E-12 |
| BP | GO:0006836 | neurotransmitter transport | 2.37E-11 |
| BP | GO:0046883 | regulation of hormone secretion | 2.01E-10 |
| BP | GO:0050708 | regulation of protein secretion | 1.24E-09 |
| BP | GO:0006874 | cellular calcium ion homeostasis | 0.000125 |
| MF | GO:0015267 | channel activity | 0.001205 |
| MF | GO:0022803 | passive transmembrane transporter activity | 0.001205 |
| BP | GO:0051047 | positive regulation of secretion | 2.41E-07 |
| CC | GO:0097060 | synaptic membrane | 5.00E-06 |
| MF | GO:0005261 | cation channel activity | 4.99E-05 |
| MF | GO:0005216 | ion channel activity | 0.000955 |
| BP | GO:0090276 | regulation of peptide hormone secretion | 3.74E-11 |
| BP | GO:0002791 | regulation of peptide secretion | 5.07E-11 |
| BP | GO:0090087 | regulation of peptide transport | 6.42E-11 |
| BP | GO:0099003 | vesicle-mediated transport in synapse | 2.63E-10 |
| BP | GO:1903532 | positive regulation of secretion by cell | 1.97E-07 |
| BP | GO:0061564 | axon development | 0.001853 |
| CC | GO:0098978 | glutamatergic synapse | 1.22E-06 |
| BP | GO:0099504 | synaptic vesicle cycle | 3.69E-10 |
| BP | GO:0007409 | axonogenesis | 0.001074 |
| BP | GO:0090066 | regulation of anatomical structure size | 0.005496 |
| CC | GO:0150034 | distal axon | 2.56E-07 |
| BP | GO:0001505 | regulation of neurotransmitter levels | 4.67E-08 |
| BP | GO:0045055 | regulated exocytosis | 2.44E-07 |
| BP | GO:0050796 | regulation of insulin secretion | 2.93E-10 |
| BP | GO:0006816 | calcium ion transport | 0.005535 |
| BP | GO:0042391 | regulation of membrane potential | 0.005658 |
| BP | GO:0034765 | regulation of ion transmembrane transport | 0.019441 |
| MF | GO:0022836 | gated channel activity | 0.001192 |
| BP | GO:0048167 | regulation of synaptic plasticity | 3.80E-07 |
| BP | GO:0017157 | regulation of exocytosis | 6.00E-07 |
| BP | GO:0006813 | potassium ion transport | 1.03E-05 |
| BP | GO:0060249 | anatomical structure homeostasis | 0.000446 |
| BP | GO:0010038 | response to metal ion | 0.00148 |
| BP | GO:0051480 | regulation of cytosolic calcium ion concentration | 0.001762 |
| BP | GO:0010975 | regulation of neuron projection development | 0.014997 |
| BP | GO:0051960 | regulation of nervous system development | 0.018375 |
| CC | GO:0030672 | synaptic vesicle membrane | 8.99E-13 |
| CC | GO:0099501 | exocytic vesicle membrane | 8.99E-13 |
| CC | GO:0005911 | cell-cell junction | 0.027963 |
| BP | GO:0007269 | neurotransmitter secretion | 1.37E-08 |
| BP | GO:0099643 | signal release from synapse | 1.37E-08 |
| BP | GO:0010959 | regulation of metal ion transport | 0.016874 |
| BP | GO:0034329 | cell junction assembly | 0.024487 |
| CC | GO:1990351 | transporter complex | 0.006757 |
| BP | GO:0071805 | potassium ion transmembrane transport | 4.11E-05 |
| CC | GO:1902495 | transmembrane transporter complex | 0.008354 |
| BP | GO:0007188 | adenylate cyclase-modulating G protein-coupled receptor signaling pathway | 0.000546 |
| BP | GO:1903522 | regulation of blood circulation | 0.001111 |
| BP | GO:0007204 | positive regulation of cytosolic calcium ion concentration | 0.011304 |
| CC | GO:0034703 | cation channel complex | 5.53E-05 |
| CC | GO:0034702 | ion channel complex | 0.001558 |
| BP | GO:0016079 | synaptic vesicle exocytosis | 5.49E-08 |
| BP | GO:0009743 | response to carbohydrate | 0.000769 |
| BP | GO:0003018 | vascular process in circulatory system | 0.003912 |
| BP | GO:0001894 | tissue homeostasis | 0.005489 |
| BP | GO:0043270 | positive regulation of ion transport | 0.005496 |
| BP | GO:0001764 | neuron migration | 8.29E-05 |
| BP | GO:0009749 | response to glucose | 0.00042 |
| BP | GO:0009746 | response to hexose | 0.000515 |
| BP | GO:0034284 | response to monosaccharide | 0.000755 |
| BP | GO:0042593 | glucose homeostasis | 0.005489 |
| BP | GO:0033500 | carbohydrate homeostasis | 0.005496 |
| CC | GO:0042734 | presynaptic membrane | 5.83E-06 |
| CC | GO:0098984 | neuron to neuron synapse | 0.041645 |
| CC | GO:0044306 | neuron projection terminus | 9.17E-06 |
| MF | GO:0022843 | voltage-gated cation channel activity | 0.000471 |
| MF | GO:0005244 | voltage-gated ion channel activity | 0.005381 |
| MF | GO:0022832 | voltage-gated channel activity | 0.005381 |
| BP | GO:0046887 | positive regulation of hormone secretion | 8.13E-05 |
| BP | GO:0051592 | response to calcium ion | 0.00043 |
| BP | GO:0098657 | import into cell | 0.03026 |
| BP | GO:0015850 | organic hydroxy compound transport | 0.038405 |
| CC | GO:0043679 | axon terminus | 1.16E-05 |
| CC | GO:0045211 | postsynaptic membrane | 0.033987 |
| BP | GO:0017156 | calcium-ion regulated exocytosis | 6.11E-07 |
| BP | GO:0051588 | regulation of neurotransmitter transport | 5.92E-05 |
| BP | GO:0015837 | amine transport | 6.34E-05 |
| BP | GO:1903305 | regulation of regulated secretory pathway | 0.001365 |
| BP | GO:0007416 | synapse assembly | 0.010552 |
| BP | GO:0050803 | regulation of synapse structure or activity | 0.035488 |
| CC | GO:0043204 | perikaryon | 0.001109 |
| MF | GO:0000149 | SNARE binding | 0.00058 |
| MF | GO:0015079 | potassium ion transmembrane transporter activity | 0.005381 |
| MF | GO:0005516 | calmodulin binding | 0.026398 |
| BP | GO:0046928 | regulation of neurotransmitter secretion | 8.60E-05 |
| BP | GO:0090277 | positive regulation of peptide hormone secretion | 0.000144 |
| BP | GO:0051952 | regulation of amine transport | 0.000158 |
| BP | GO:0002793 | positive regulation of peptide secretion | 0.000173 |
| BP | GO:0043266 | regulation of potassium ion transport | 0.000769 |
| BP | GO:0008277 | regulation of G protein-coupled receptor signaling pathway | 0.004838 |
| BP | GO:0050806 | positive regulation of synaptic transmission | 0.014665 |
| BP | GO:0010721 | negative regulation of cell development | 0.030922 |
| BP | GO:0071248 | cellular response to metal ion | 0.041237 |
| BP | GO:0007626 | locomotory behavior | 0.042464 |
| BP | GO:0045664 | regulation of neuron differentiation | 0.042464 |
| CC | GO:0098563 | intrinsic component of synaptic vesicle membrane | 1.34E-08 |
| CC | GO:0030426 | growth cone | 0.006176 |
| CC | GO:0030427 | site of polarized growth | 0.007872 |
| CC | GO:0031225 | anchored component of membrane | 0.008354 |
| BP | GO:0140029 | exocytic process | 0.000136 |
| BP | GO:0050714 | positive regulation of protein secretion | 0.010043 |
| BP | GO:0035296 | regulation of tube diameter | 0.018083 |
| BP | GO:0097746 | blood vessel diameter maintenance | 0.018083 |
| BP | GO:0035150 | regulation of tube size | 0.018812 |
| BP | GO:0051048 | negative regulation of secretion | 0.047702 |
| CC | GO:0048786 | presynaptic active zone | 5.53E-05 |
| MF | GO:0005267 | potassium channel activity | 0.009773 |
| MF | GO:0015085 | calcium ion transmembrane transporter activity | 0.018072 |
| BP | GO:0036465 | synaptic vesicle recycling | 0.000853 |
| BP | GO:0045921 | positive regulation of exocytosis | 0.002148 |
| BP | GO:0006906 | vesicle fusion | 0.010064 |
| BP | GO:0090174 | organelle membrane fusion | 0.012599 |
| BP | GO:0098659 | inorganic cation import across plasma membrane | 0.019441 |
| BP | GO:0099587 | inorganic ion import across plasma membrane | 0.019441 |
| BP | GO:0051224 | negative regulation of protein transport | 0.026019 |
| BP | GO:1904950 | negative regulation of establishment of protein localization | 0.031679 |
| BP | GO:0060078 | regulation of postsynaptic membrane potential | 0.034612 |
| BP | GO:0007586 | digestion | 0.043186 |
| BP | GO:0031644 | regulation of nervous system process | 0.044749 |
| BP | GO:0050768 | negative regulation of neurogenesis | 0.047989 |
| BP | GO:0048284 | organelle fusion | 0.049817 |
| BP | GO:0070555 | response to interleukin-1 | 0.049817 |
| CC | GO:0008076 | voltage-gated potassium channel complex | 0.000559 |
| CC | GO:0034705 | potassium channel complex | 0.001276 |
| CC | GO:0099240 | intrinsic component of synaptic membrane | 0.044963 |
| MF | GO:0005249 | voltage-gated potassium channel activity | 0.005843 |
| MF | GO:0005262 | calcium channel activity | 0.023713 |
| BP | GO:0048499 | synaptic vesicle membrane organization | 3.13E-06 |
| BP | GO:0017158 | regulation of calcium ion-dependent exocytosis | 8.29E-05 |
| BP | GO:0046888 | negative regulation of hormone secretion | 0.001365 |
| BP | GO:0032024 | positive regulation of insulin secretion | 0.002816 |
| BP | GO:0050709 | negative regulation of protein secretion | 0.00306 |
| BP | GO:0051937 | catecholamine transport | 0.004463 |
| BP | GO:0042310 | vasoconstriction | 0.009424 |
| BP | GO:0015844 | monoamine transport | 0.010053 |
| BP | GO:1901379 | regulation of potassium ion transmembrane transport | 0.019693 |
| BP | GO:0060291 | long-term synaptic potentiation | 0.023862 |
| BP | GO:0099565 | chemical synaptic transmission, postsynaptic | 0.028273 |
| BP | GO:0022600 | digestive system process | 0.033275 |
| BP | GO:0007218 | neuropeptide signaling pathway | 0.03822 |
| CC | GO:0030285 | integral component of synaptic vesicle membrane | 1.92E-06 |
| CC | GO:0098685 | Schaffer collateral - CA1 synapse | 0.001558 |
| MF | GO:0001786 | phosphatidylserine binding | 0.002733 |
| MF | GO:0019905 | syntaxin binding | 0.005843 |
| MF | GO:0005546 | phosphatidylinositol-4,5-bisphosphate binding | 0.012152 |
| MF | GO:0072341 | modified amino acid binding | 0.021603 |
| MF | GO:1902936 | phosphatidylinositol bisphosphate binding | 0.042239 |
| BP | GO:0031629 | synaptic vesicle fusion to presynaptic active zone membrane | 1.19E-05 |
| BP | GO:0099500 | vesicle fusion to plasma membrane | 1.67E-05 |
| BP | GO:0090278 | negative regulation of peptide hormone secretion | 0.000686 |
| BP | GO:0002792 | negative regulation of peptide secretion | 0.000769 |
| BP | GO:1903307 | positive regulation of regulated secretory pathway | 0.002918 |
| BP | GO:0050433 | regulation of catecholamine secretion | 0.005496 |
| BP | GO:0048278 | vesicle docking | 0.005729 |
| BP | GO:0050432 | catecholamine secretion | 0.005729 |
| BP | GO:0048488 | synaptic vesicle endocytosis | 0.00857 |
| BP | GO:0140238 | presynaptic endocytosis | 0.00857 |
| BP | GO:0019229 | regulation of vasoconstriction | 0.010841 |
| BP | GO:0140056 | organelle localization by membrane tethering | 0.023147 |
| BP | GO:0031016 | pancreas development | 0.033392 |
| BP | GO:0019935 | cyclic-nucleotide-mediated signaling | 0.036553 |
| BP | GO:0022406 | membrane docking | 0.03822 |
| BP | GO:0071277 | cellular response to calcium ion | 0.03822 |
| CC | GO:0031045 | dense core granule | 1.49E-05 |
| CC | GO:0043195 | terminal bouton | 0.000846 |
| CC | GO:0098889 | intrinsic component of presynaptic membrane | 0.008976 |
| CC | GO:0098839 | postsynaptic density membrane | 0.023845 |
| MF | GO:0030276 | clathrin binding | 0.018072 |
| MF | GO:0017022 | myosin binding | 0.021603 |
| BP | GO:0045956 | positive regulation of calcium ion-dependent exocytosis | 5.92E-05 |
| BP | GO:0031338 | regulation of vesicle fusion | 0.000249 |
| BP | GO:0046676 | negative regulation of insulin secretion | 0.002694 |
| BP | GO:0006904 | vesicle docking involved in exocytosis | 0.003592 |
| BP | GO:2001222 | regulation of neuron migration | 0.008474 |
| BP | GO:0019933 | cAMP-mediated signaling | 0.01633 |
| BP | GO:0043268 | positive regulation of potassium ion transport | 0.017752 |
| BP | GO:2000300 | regulation of synaptic vesicle exocytosis | 0.026019 |
| BP | GO:0070542 | response to fatty acid | 0.041237 |
| BP | GO:0048857 | neural nucleus development | 0.043186 |
| CC | GO:0048787 | presynaptic active zone membrane | 0.000417 |
| CC | GO:0016328 | lateral plasma membrane | 0.0208 |
| CC | GO:0099056 | integral component of presynaptic membrane | 0.024987 |
| MF | GO:0005544 | calcium-dependent phospholipid binding | 0.023713 |
| BP | GO:0031630 | regulation of synaptic vesicle fusion to presynaptic active zone membrane | 3.73E-05 |
| BP | GO:1901632 | regulation of synaptic vesicle membrane organization | 3.73E-05 |
| BP | GO:0048489 | synaptic vesicle transport | 0.033392 |
| BP | GO:0051954 | positive regulation of amine transport | 0.033392 |
| BP | GO:1901381 | positive regulation of potassium ion transmembrane transport | 0.044416 |
| BP | GO:0060612 | adipose tissue development | 0.047989 |
| BP | GO:1900271 | regulation of long-term synaptic potentiation | 0.047989 |
| CC | GO:0098992 | neuronal dense core vesicle | 7.79E-05 |
| CC | GO:0031201 | SNARE complex | 0.028524 |
| MF | GO:0005227 | calcium activated cation channel activity | 0.006868 |
| MF | GO:0005251 | delayed rectifier potassium channel activity | 0.018072 |
| MF | GO:0022839 | ion gated channel activity | 0.046525 |
| BP | GO:0098814 | spontaneous synaptic transmission | 0.004775 |
| BP | GO:0048791 | calcium ion-regulated exocytosis of neurotransmitter | 0.011778 |
| BP | GO:0016082 | synaptic vesicle priming | 0.016886 |
| BP | GO:0098719 | sodium ion import across plasma membrane | 0.03822 |
| BP | GO:0050995 | negative regulation of lipid catabolic process | 0.042467 |
| CC | GO:0016342 | catenin complex | 0.033987 |
| CC | GO:0098686 | hippocampal mossy fiber to CA3 synapse | 0.042113 |
| MF | GO:0031489 | myosin V binding | 0.011796 |
| MF | GO:0031690 | adrenergic receptor binding | 0.016452 |
| MF | GO:0030507 | spectrin binding | 0.043567 |
| MF | GO:0035925 | mRNA 3'-UTR AU-rich region binding | 0.043567 |
| BP | GO:0033366 | protein localization to secretory granule | 0.001762 |
| BP | GO:0003310 | pancreatic A cell differentiation | 0.010552 |
| BP | GO:0010807 | regulation of synaptic vesicle priming | 0.014997 |
| BP | GO:0045955 | negative regulation of calcium ion-dependent exocytosis | 0.014997 |
| BP | GO:1990504 | dense core granule exocytosis | 0.014997 |
| BP | GO:0032353 | negative regulation of hormone biosynthetic process | 0.019693 |
| BP | GO:0086015 | SA node cell action potential | 0.019693 |
| BP | GO:0086018 | SA node cell to atrial cardiac muscle cell signaling | 0.019693 |
| BP | GO:0032351 | negative regulation of hormone metabolic process | 0.033392 |
| BP | GO:0086070 | SA node cell to atrial cardiac muscle cell communication | 0.033392 |
| BP | GO:0099624 | atrial cardiac muscle cell membrane repolarization | 0.033392 |
| BP | GO:0016188 | synaptic vesicle maturation | 0.040582 |
| BP | GO:0033604 | negative regulation of catecholamine secretion | 0.047989 |
| CC | GO:0098993 | anchored component of synaptic vesicle membrane | 0.018881 |
| CC | GO:0032045 | guanyl-nucleotide exchange factor complex | 0.041645 |
| CC | GO:0098945 | intrinsic component of presynaptic active zone membrane | 0.041645 |
| CC | GO:0044305 | calyx of Held | 0.046139 |
| MF | GO:0038100 | nodal binding | 0.005381 |
| MF | GO:0008331 | high voltage-gated calcium channel activity | 0.03364 |
| MF | GO:0015269 | calcium-activated potassium channel activity | 0.042239 |
| BP | GO:0021730 | trigeminal sensory nucleus development | 0.014997 |
| BP | GO:0021740 | principal sensory nucleus of trigeminal nerve development | 0.014997 |
| BP | GO:0007412 | axon target recognition | 0.033582 |
| BP | GO:0061110 | dense core granule biogenesis | 0.033582 |
| BP | GO:2000705 | regulation of dense core granule biogenesis | 0.033582 |
| CC | GO:0070554 | synaptobrevin 2-SNAP-25-syntaxin-3-complexin complex | 0.006176 |
| CC | GO:0070033 | synaptobrevin 2-SNAP-25-syntaxin-1a-complexin II complex | 0.015051 |
| CC | GO:0099012 | neuronal dense core vesicle membrane | 0.038861 |
| CC | GO:0098835 | presynaptic endocytic zone membrane | 0.049628 |
| MF | GO:0031696 | alpha-2C adrenergic receptor binding | 0.016452 |

**Table S3. KEGG pathway enrichment analysis**

| ID | Description | p.adjust |
| --- | --- | --- |
| hsa04911 | Insulin secretion | 4.56E-09 |
| hsa04024 | cAMP signaling pathway | 0.012694 |
| hsa04728 | Dopaminergic synapse | 0.013387 |
| hsa04723 | Retrograde endocannabinoid signaling | 0.021859 |
| hsa04261 | Adrenergic signaling in cardiomyocytes | 0.02535 |
| hsa04022 | cGMP-PKG signaling pathway | 0.03831 |
| hsa04721 | Synaptic vesicle cycle | 0.002744 |
| hsa04713 | Circadian entrainment | 0.01148 |
| hsa04725 | Cholinergic synapse | 0.013977 |
| hsa04724 | Glutamatergic synapse | 0.013977 |
| hsa04726 | Serotonergic synapse | 0.03831 |
| hsa04950 | Maturity onset diabetes of the young | 9.13E-05 |
| hsa05031 | Amphetamine addiction | 0.013977 |
| hsa04930 | Type II diabetes mellitus | 0.013387 |
| hsa04973 | Carbohydrate digestion and absorption | 0.013387 |
| hsa04720 | Long-term potentiation | 0.03831 |
| hsa05033 | Nicotine addiction | 0.02535 |
| hsa04940 | Type I diabetes mellitus | 0.031843 |

**Table S4. GSEA results**

| ID | ES | NES | p.adjust |
| --- | --- | --- | --- |
| GOBP_TUBE_MORPHOGENESIS | 0.411867331 | 2.382684 | 0.030906 |
| GOBP_EPITHELIUM_DEVELOPMENT | 0.363191388 | 2.321169 | 0.042884 |
| GOBP_POSITIVE_REGULATION | 0.380674656 | 2.306994 | 0.030906 |
| _OF_GENE_EXPRESSION |
| GOBP_DEFENSE_RESPONSE | 0.360917042 | 2.405751 | 0.024467 |
| GOBP_ANATOMICAL_STRUCTURE | 0.380053072 | 2.41048 | 0.028018 |
| _FORMATION_INVOLVED_IN_MORPHOGENESIS |
| GOBP_RESPONSE_TO_CYTOKINE | 0.466273905 | 2.69743 | 0.014243 |
| GOBP_CYTOKINE_MEDIATED | 0.663830981 | 2.66616 | 0.014243 |
| _SIGNALING_PATHWAY |
| GOBP_BIOLOGICAL_PROCESS_INVOLVED | 0.460007803 | 2.66118 | 0.014243 |
| _IN_INTERSPECIES_INTERACTION_BETWEEN_ORGANISMS |
| GOBP_DEFENSE_RESPONSE_TO | 0.534273717 | 2.648598 | 0.014243 |
| _OTHER_ORGANISM |
| GOBP_INNATE_IMMUNE_RESPONSE | 0.501910764 | 2.308399 | 0.024467 |
| GOBP_REGULATION_OF_RESPONSE_TO_STRESS | 0.465636631 | 2.821887 | 0.009609 |
| GOBP_POSITIVE_REGULATION | -0.647302311 | -2.43203 | 0.020313 |
| _OF_CYTOSOLIC_CALCIUM_ION_CONCENTRATION |
| HP_ABNORMAL_JOINT_MORPHOLOGY | 0.410209244 | 2.621661 | 0.014817 |

**Table S5. Druggability of ICGs**

| **Target** | **Target full name** | **Drug or component name** | **Drug groups** | **Indication** | **Detailed information** |
| --- | --- | --- | --- | --- | --- |
| CD44 | CD44 molecule | BIVATUZUMAB | Investigational | Investigated for use/treatment in cancer/tumors (unspecified) and head and neck cancer. | [Detailes](https://go.drugbank.com/drugs/DB06550) |
|  |  | Hyaluronic acid | Approved | The intra-articular preparations of hyaluronic acid are indicated for knee pain associated with osteoarthritis. Hyaluronic acid is used in cosmetic applications to prevent and reduce the appearance of wrinkles on the face, and as a dermal filler to correct facial imperfections or other imperfections on other parts of the body. It is frequently an ingredient in topical applications for wound healing and symptomatic treatment of skin irritation from various causes. Hyaluronic acid may also be indicated in ophthalmological preparations or oral capsules to treat discomfort caused by dry eyes or conjunctivitis and for its protective qualities during and before eye surgery. Finally, hyaluronic acid can be used off-label to coat the bladder for relief of interstitial cystitis symptoms. | [Details](https://go.drugbank.com/drugs/DB08818) |
|  |  | Docetaxel | Approved, Investigational | Docetaxel is indicated as a single agent for the treatment of locally advanced or metastatic breast cancer after chemotherapy failure; and with doxorubicin and cyclophosphamide as adjuvant treatment of operable node-positive BC. It is also indicated as a single agent for locally advanced or metastatic non-small cell lung cancer (NSCLC) after platinum therapy failure; and with cisplatin for unresectable, locally advanced or metastatic untreated NSCLC. For the treatment of metastatic castration-resistant prostate cancer, docetaxel is indicated with prednisone. Docetaxel is also indicated with cisplatin and fluorouracil for untreated, advanced gastric adenocarcinoma, including the gastroesophageal junction, and with cisplatin and fluorouracil for induction treatment of locally advanced squamous cell carcinoma of the head and neck (SCCHN). | [Details](https://go.drugbank.com/drugs/DB01248) |
|  |  | Gentamicin | Approved | Gentamicin is an aminoglycoside used to treat a wide variety of aerobic infections in the body. | [Details](https://go.drugbank.com/drugs/DB00798) |
|  |  | Progesterone | Approved | The gelatinized capsules are indicated for use in the prevention of endometrial hyperplasia in non-hysterectomized postmenopausal women who are receiving conjugated estrogens tablets. They are also indicated for use in secondary amenorrhea. Progesterone gel (8%) is indicated as progesterone supplementation or replacement as part of an Assisted Reproductive Technology (“ART”) treatment for infertile women with progesterone deficiency. The lower concentration progesterone gel (4%) is used in the treatment of secondary amenorrhea, with the use of the 8% concentration if there is no therapeutic response to the 4% gel. Gelatinized capsules The gelatinized capsules are indicated for use in the prevention of endometrial hyperplasia in non-hysterectomized postmenopausal women who are receiving conjugated estrogens tablets. They are also indicated for use in secondary amenorrhea . Vaginal gel Progesterone gel (8%) is indicated as progesterone supplementation or replacement as part of an Assisted Reproductive Technology (“ART”) treatment for infertile women with progesterone deficiency. The lower concentration progesterone gel (4%) is used in the treatment of secondary amenorrhea, with the use of the 8% concentration if there is no therapeutic response to the 4% gel . Vaginal insert This form is indicated to support embryo implantation and early pregnancy by supplementation of corpus luteal function as part of an Assisted Reproductive Technology (ART) treatment program for infertile women. Injection (intramuscular) This drug is indicated in amenorrhea and abnormal uterine bleeding due to hormonal imbalance in the absence of organic pathology, such as submucous fibroids or uterine cancer. Tablets, contraceptive The tablet form of progesterone in contraceptive formulations is indicated for the prevention of pregnancy. | [Details](https://go.drugbank.com/drugs/DB00396) |
|  |  | MOMETASONE | Experimental | The inhaler is indicated for the maintenance treatment of asthma as prophylactic therapy. The nasal spray is indicated for the treatment of the nasal symptoms of seasonal allergic and perennial allergic rhinitis. | [Details](https://go.drugbank.com/drugs/DB00764) |
| CD47&SIRPA (CD47L) | CD47 molecule&Signal Regulatory Protein Alpha | Evorpacept | Investigational | Evorpacept is under investigation in clinical trial NCT04755244 (A Study of Evorpacept (ALX148) With Venetoclax and Azacitidine for Acute Myeloid Leukemia (ASPEN-05)). | [Details](https://go.drugbank.com/drugs/DB17573) |
|  |  | Magrolimab | Investigational | Magrolimab is under investigation in clinical trial NCT02953782 (Trial of Magrolimab (Hu5f9-g4) in Combination With Cetuximab in Participants With Solid Tumors and Advanced Colorectal Cancer). | [Details](https://go.drugbank.com/drugs/DB16225) |
|  |  | Ligufalimab | Investigational | Ligufalimab is a humanized immunoglobulin G4 (IgG4) monoclonal antibody targeting leukocyte surface antigen CD47. It is under investigation in clinical trial NCT04900350 (A Trial of AK117 (Anti-cd47) in Patients With Myelodysplastic Syndrome). | [Details](https://go.drugbank.com/drugs/DB17542) |
|  |  | Lemzoparlimab | Investigational | Lemzoparlimab is under investigation in clinical trial NCT04912063 (Study to Evaluate Adverse Events and Movement of Lemzoparlimab in Body When Used Intravenously (IV) With Azacitidine Subcutaneously or IV and Venetoclax Orally in Participants With Acute Myeloid Leukemia and With Azacitidine With or Without Venetoclax in Participants With Myelodysplastic Syndrome). | [Details](https://go.drugbank.com/drugs/DB17572) |
|  |  | ABT-510 | Investigational | ABT-510 is a peptide mimetic of thrombospondin-1 (TSP-1), blocks angiogenesis in vitro and in vivo, and slows tumor growth. It is developed by Abbott Laboratories for the treatment of Solid Tumors, Lymphoma and Melanoma. | [Details](https://go.drugbank.com/drugs/DB05434) |
| HAVCR2 | Hepatitis A Virus Cellular Receptor 2 | Sabatolimab | Investigational | Sabatolimab is under investigation in clinical trial NCT03946670 (A Study of MBG453 in Combination With Hypomethylating Agents in Subjects With IPSS-R Intermediate, High or Very High Risk Myelodysplastic Syndrome (MDS).). | [Details](https://go.drugbank.com/drugs/DB16322) |
|  |  | Cobolimab | Investigational | Cobolimab is under investigation in clinical trial NCT04655976 (Study of Cobolimab in Combination With Dostarlimab and Docetaxel in Advanced NSCLC Participants). | [Details](https://go.drugbank.com/drugs/DB16372) |
| TNFSF9&TNFRSF9 | TNF Superfamily Member 9&TNF Receptor Superfamily Member 9 | Utomilumab | Investigational | Utomilumab is under investigation in clinical trial NCT03318900 (T Cell Immunotherapy for Advanced Ovarian Cancer). | [Details](https://go.drugbank.com/drugs/DB15113) |
|  |  | Urelumab | Investigational | Urelumab has been used in trials studying the treatment of Leukemia, Multiple Myeloma, Malignant Tumors, and Cancer - Solid Tumors and B-Cell Non-Hodgkin's Lymphoma. Urelumab is a fully human antibody that targets CD137. The antibody product was developed using Medarex's UltiMAb(R) technology and was the first UltiMAb- derived antibody in clinical development by Bristol-Myers Squibb under the December 2003 agreement with Medarex. | [Details](https://go.drugbank.com/drugs/DB12077) |
| VTCN1 | V-Set Domain Containing T Cell Activation Inhibitor 1 | - | - | - | - |


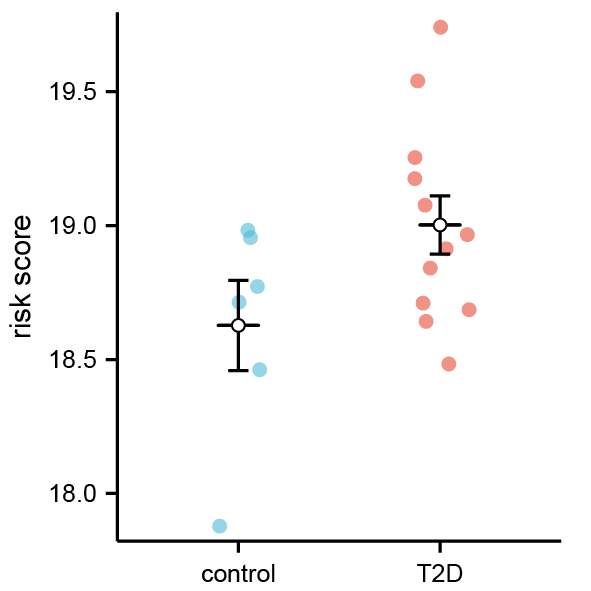


**Figure S1**: Type 2 diabetes risk score of case and control group based on PBMC samples from GSE156993. Red: type 2 diabetes group, blue: control group.


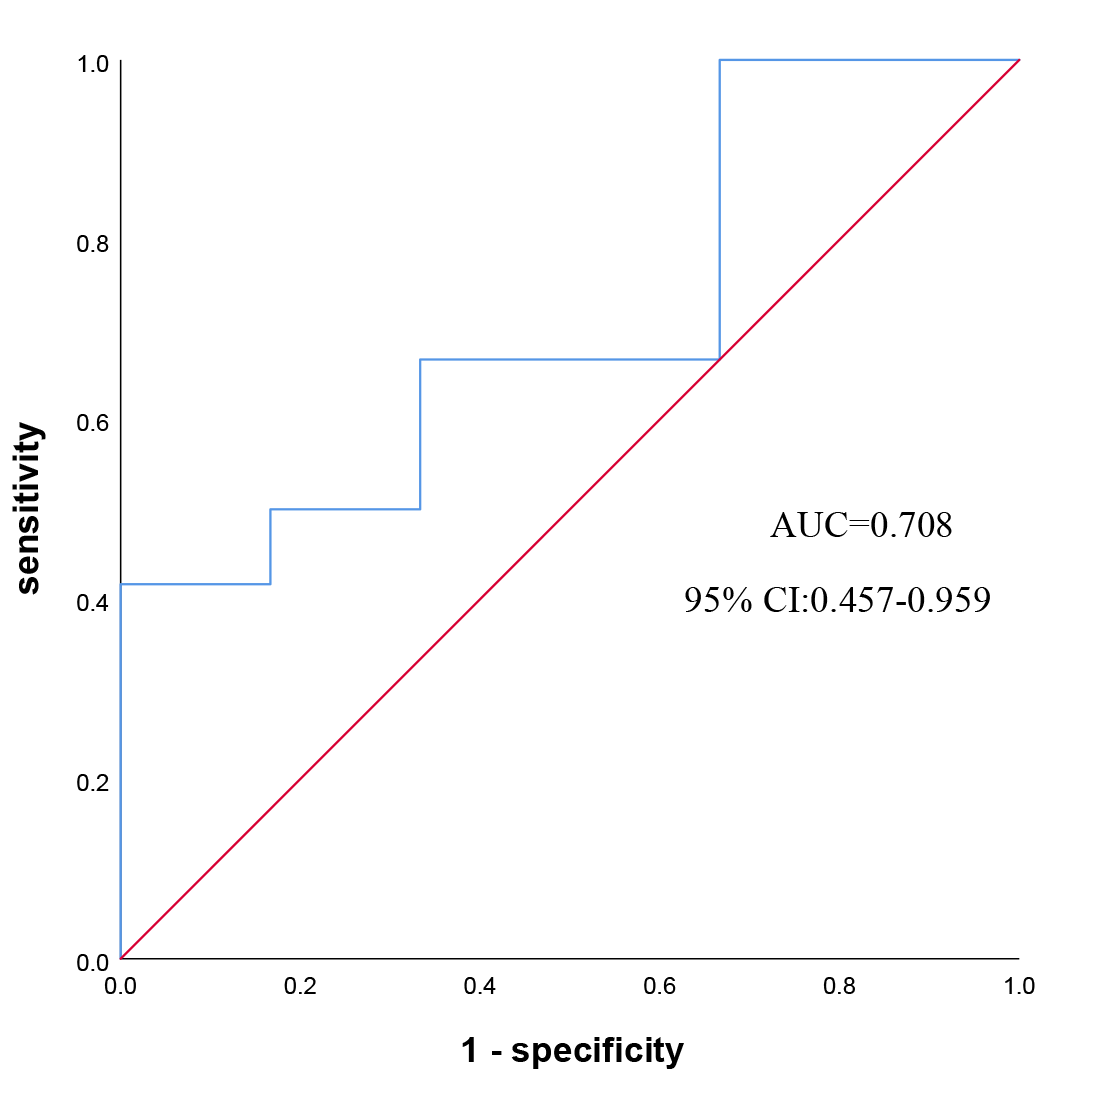


**Figure S2:** ROC curve of type 2 diabetes risk model based on PBMC samples. AUC: area under curve; CI: confidence interval.


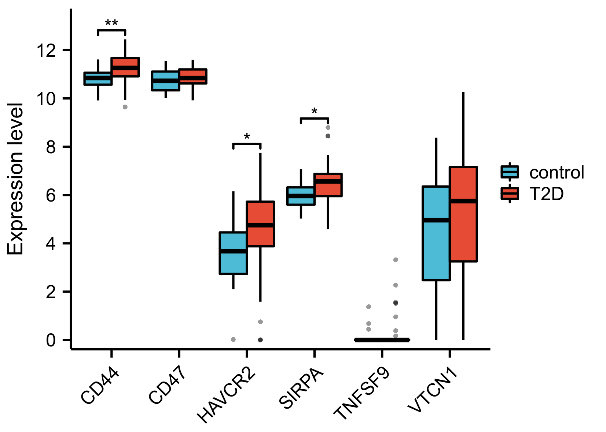


**Figure S3:** Expression of ICGs between type 2 diabetes and control group in GSE156993; x-axis: ICGs, y-axis: gene expression level; red: type 2 diabetes group, blue: control group. *: *P* <0.05, **: *P* <0.01.
